# Supplementary material for: Arbitrary, direct and deterministic manipulation of vector beams via electrically-tuned q-plates
Source: PubMed Central journal article supplement — Sci Rep. 2015 Jan 19;5:7840. doi: 10.1038/srep07840 (PMC4297978; doi:10.1038/srep07840), 2015-01-19
Supplement: srep07840-s1.pdf [file srep07840-s1.pdf]

# Arbitrary, direct and deterministic manipulation of vector beams via electrically-tuned q-plates - Supplementary information

Vincenzo D'Ambrosio,<sup>1</sup> Flavio Baccari,<sup>1</sup> Sergei Slussarenko,<sup>2</sup> Lorenzo Marrucci,<sup>3,2</sup> and Fabio Sciarrino<sup>1</sup>

<sup>1</sup>*Dipartimento di Fisica, "Sapienza" Università di Roma, I-00185 Roma, Italy*

<sup>2</sup>*Dipartimento di Fisica, Università di Napoli Federico II,*

*Complesso Universitario di Monte S. Angelo, 80126 Napoli, Italy*

<sup>3</sup>*CNR-SPIN, Complesso Universitario di Monte S. Angelo, 80126 Napoli, Italy*

PACS numbers:

We have seen that one can manipulate the inhomogeneous state of polarization of a vector-vortex (VV) beam, identified through a hybrid Poincaré sphere (HPS) representation in a opposite topological charge OAM eigenstate basis, by acting with a q-plate with arbitrary retardation  $\delta$ . The q-plate action consists of a rotation around an axis lying in the  $xy$  plane, whose orientation depends on the QP specific geometry defined by  $\alpha_0$ . Consider an input state of polarization, corresponding to a point  $\vec{r}_0 = (x_0, y_0, z_0)$  lying on the unit sphere represented in cartesian coordinates (i.e. the generalized Stokes parameters). Arbitrary manipulation implies capability to reach an arbitrary location  $\vec{r}_1 = (x_1, y_1, z_1)$  on the same sphere. We show how it is possible to accomplish this task by exploiting two sequential rotations around orthogonal axes lying in the  $xy$  plane. Without loss of generality, we can choose such axes to be precisely  $x$  and  $y$ . The pair of rotations is hence represented by the following matrices

$$R_x[\alpha] = \begin{pmatrix} 1 & 0 & 0 \\ 0 & \cos \alpha & -\sin \alpha \\ 0 & \sin \alpha & \cos \alpha \end{pmatrix} \quad (1)$$

and

$$R_y[\beta] = \begin{pmatrix} \cos \beta & 0 & \sin \beta \\ 0 & 1 & 0 \\ -\sin \beta & 0 & \cos \beta \end{pmatrix} \quad (2)$$

The strategy we want to adopt is the following: consider the orbit traced on the sphere by the two points  $\vec{r}_0$  and  $\vec{r}_1$  rotating respectively around the  $x$  and  $y$  axis. As first step, suppose such trajectories intersect in some point  $\vec{t}$ . Then it is enough to solve the two systems

$$R_x[\alpha] \cdot \vec{r}_0 = \vec{t}, \quad R_y[\beta] \cdot \vec{t} = \vec{r}_1 \quad (3)$$

to determine the rotation angles  $\alpha$  and  $\beta$  required to end up on  $\vec{r}_1$ , upon starting from  $\vec{r}_0$ . To determine the intersection point  $\vec{t}$ , we observe that the two rotation trajectories belong to orthogonal planes, represented by

$$\begin{aligned} P_0 &= \{(x, y, z) \mid x = x_0 \text{ and } y, z \in \mathbb{R}\} \\ P_1 &= \{(x, y, z) \mid y = y_1 \text{ and } x, z \in \mathbb{R}\} \end{aligned} \quad (4)$$

$P_0$  is the plane orthogonal to  $x$  and passing through  $\vec{r}_0$ , while  $P_1$  is orthogonal to  $y$  and containing  $\vec{r}_1$ . Since such planes are not parallel, they intersect on a straight line, parametrized by  $(x_0, y_1, z)$  with  $z \in \mathbb{R}$ . Thus, the coordinates of the orbit intersection points are identified by the constraint  $x_0^2 + y_1^2 + z^2 = 1$  and correspond to the two values

$$\bar{z} = \pm \sqrt{1 - x_0^2 - y_1^2} \quad (5)$$

We recognize that equation (5) cannot be solved for all possible  $x_0$  and  $y_1$  values, since  $x_0^2 + y_1^2 > 1$  implies  $\bar{z}$  being an imaginary number. This condition corresponds to cases in which the  $P_i$  planes intersect outside the unit sphere, a clear example being the choice  $\vec{r}_0 = (1, 0, 0)$  and  $\vec{r}_1 = (0, 1, 0)$ . However, for our purposes it is enough to demonstrate that, in such cases, one can simply switch  $R_x$  and  $R_y$  roles (i.e. rotating first around the  $y$  axis and then around  $x$ ) to accomplish the desired transformation. Inverting the rotation order consists in  $P_0, P_1$  becoming the planes passing

through  $y_0$  and  $x_1$  respectively. Therefore, the intersection equation (5) becomes

$$\bar{z} = \pm \sqrt{1 - x_1^2 - y_0^2} \quad (6)$$

As a last step, we show that for any starting and ending point choice, at least one of the rotation's order allows one to connect  $\vec{r}_1$  and  $\vec{r}_0$ . Indeed, suppose that the  $R_x R_y$  strategy cannot be accomplished, meaning that the coordinates of the two points satisfy  $x_0^2 + y_1^2 > 1$ . Then, by exploiting the normalization conditions  $x_i^2 + y_i^2 + z_i^2 = 1$  with  $i = 0, 1$ , one obtains

$$1 - y_0^2 - z_0^2 + 1 - x_1^2 - z_1^2 > 1 \quad (7)$$

and hence

$$x_1^2 + y_0^2 < 1 - (z_0^2 + z_1^2) < 1, \quad (8)$$

implying that the orbit intersection point can be found by solving (6). Therefore, if  $R_x R_y$  is not the right order choice, then  $R_y R_x$  is. We point out that there are also several cases in which both choices are capable of accomplishing the required transformation.

To conclude, we showed that a device represented by two q-plates with the same topological charge and initial  $\alpha_0$  orientations giving rise to orthogonal rotation axes can accomplish an arbitrary VV manipulation in the HPS, the only additional requirement being the possibility to exchange the rotation order. Since  $\alpha_0$  can be modified by simply rotating the q-plates, the exchange can be easily accomplished by switching the q-plates initial orientations. The only exception is the case  $q = 1$ , whose geometry is rotationally invariant. In this situation three q-plates are required, combined for instance in the following sequence  $R_x R_y R_x$ , in order to be allowed to chose in each case between acting with the first or the last  $R_x$ . Another possible solution consist in exploiting rotation around three orthogonal axes, such as  $R_x R_y R_z$ . Indeed,  $R_z$  action corresponds to a phase retarding between right and left circular polarization components, hence it can easily accomplished by means of a polarization rotator [1].

---

[1] Q. Zhan and J. R. Leger, Applied optics **41**, 4630 (2002).
